# Supplementary material for: Biomarker-based clustering of patients with chronic obstructive pulmonary disease
Source: PubMed Central journal article supplement — ERJ Open Res. 2023 Feb 6;9(1):00301-2022. doi: 10.1183/23120541.00301-2022 (PMC9900445; doi:10.1183/23120541.00301-2022), 2023-02-06
Supplement: 00301-2022.supplementary_tables.pdf [file 00301-2022.supplementary_tables.pdf]

**Table S1: Description of the biomarkers and their gene symbol included in the pathway analysis.**

| <b>Biomarker name</b>                    | <b>Official gene symbol</b>                     | <b>Brief description (from NCBI gene)</b>                                                                                                                                                                   |
|------------------------------------------|-------------------------------------------------|-------------------------------------------------------------------------------------------------------------------------------------------------------------------------------------------------------------|
| Adiponectin                              | ADIPOQ                                          | Expressed exclusively in adipose tissue, but found circulating in the plasma. Involved in metabolic and hormonal processes.                                                                                 |
| Alpha-1-Antitrypsin (AAT)                | SERPINA1                                        | Secreted. It is a serine protease inhibitor that targets numerous proteolytic enzymes including elastase, thrombin and plasmin.                                                                             |
| Alpha-2-Macroglobulin (A2Macro)          | A2M                                             | A protease inhibitor for a broad spectrum of proteases such as trypsin and collagenase.                                                                                                                     |
| Angiopoietin-2 (ANG-2)                   | ANGPT2                                          | Ligand for the endothelial tyrosine kinase receptor and is an antagonist of angiopoietin-1.                                                                                                                 |
| B Lymphocyte Chemoattractant (BLC)       | CXCL13                                          | Preferentially promotes the migration of B lymphocytes expressing the receptor BLR-1.                                                                                                                       |
| Beta-2-Microglobulin (B2M)               | B2M                                             | Serum protein associated with major histocompatibility complex (MHC) class 1 heavy chain.                                                                                                                   |
| Brain-Derived Neurotrophic Factor (BDNF) | BDNF                                            | Member of the nerve growth factor family that binds to BDNFR and promotes neuronal survival in the adult brain.                                                                                             |
| Complement C3 (C3)                       | C3                                              | Plays a central role in the activation of the complement system and is required to activate classical and alternative complement pathways.                                                                  |
| Eotaxin-1                                | CCL11                                           | Part of a superfamily of secreted proteins involved in the immunoregulatory and inflammatory process. This chemokine is specific for eosinophils                                                            |
| Eotaxin-2                                | CCL24                                           | Part of a superfamily of secreted proteins involved in the immunoregulatory and inflammatory process. Displays chemotactic activity on resting T lymphocytes, but not monocytes or activated T lymphocytes. |
| Eotaxin-3                                | CCL26                                           | Part of a superfamily of secreted proteins involved in the immunoregulatory and inflammatory process. Displays chemotatic activity for blood eosinophils and basophils.                                     |
| Factor VII                               | F7                                              | A coagulation factor essential for hemostasis.                                                                                                                                                              |
| Ferritin                                 | FTH1/FTL (heavy and light chains, respectively) | The major intracellular iron storage protein. It is composed of light and heavy chains.                                                                                                                     |
| Fibrinogen                               | FG -A/B/G                                       | A blood borne glycoprotein involved in clotting, cell adhesion and spreading.                                                                                                                               |
| Haptoglobin                              | HP                                              | Bind free plasma hemoglobin.                                                                                                                                                                                |
| Immunoglobulin A (IgA)                   | IGHA1                                           | Immunoglobulin A heavy constant alpha                                                                                                                                                                       |
| Immunoglobulin M (IgM)                   | IGHM                                            | Immunoglobulin M heavy constant                                                                                                                                                                             |

| <b>Biomarker name</b>                                                        | <b>Official gene symbol</b> | <b>Brief description (from NCBI gene)</b>                                                                                                                                                                                                     |
|------------------------------------------------------------------------------|-----------------------------|-----------------------------------------------------------------------------------------------------------------------------------------------------------------------------------------------------------------------------------------------|
| Insulin-like Growth Factor-Binding Protein 2 (IGFBP-2)                       | IGFBP2                      | Can be found intracellularly or in the bloodstream. High expression levels promote growth of several different tumors or may be used to predict patient recovery.                                                                             |
| Intercellular Adhesion Molecule 1 (ICAM-1)                                   | ICAM1                       | A surface glycoprotein typically expressed on endothelial cells and immune cells. It binds to CD11/CD18 type integrins.                                                                                                                       |
| Interleukin-1 alpha (IL-1 alpha)                                             | IL1A                        | A pleiotropic cytokine produced by monocytes and macrophages. It is involved in various immune responses and inflammation processes.                                                                                                          |
| Interleukin-1 beta (IL-1 beta)                                               | IL1B                        | A cytokine produced by macrophages and processed to its active form by caspase-1. An important mediator of inflammatory processes.                                                                                                            |
| Interleukin-1 receptor antagonist (IL-1ra)                                   | IL1RN                       | Inhibits the activities of IL1A and IL1B and modulates IL1 mediated responses.                                                                                                                                                                |
| Interleukin-2 receptor alpha (IL-2 receptor alpha)                           | IL2RA                       | One of the subunits of the IL2 receptor (together with IL2RB and IL2RG).                                                                                                                                                                      |
| Interleukin-12 Subunit p40 (IL-12p40)                                        | IL12B                       | Expressed by activated macrophages and induce the development of Th1 cells.                                                                                                                                                                   |
| Interleukin-12 Subunit p70 (IL-12p70)                                        | IL12p70                     | The heterodimer of IL12A and IL12B. Produced by dendritic cells, macrophages and B-cells in response to antigenic stimulation. Stimulates production of interferon gamma and tumor necrosis factor alpha from T and natural killer (NK) cells |
| Interleukin-15 (IL-15)                                                       | IL15                        | Regulates activation and proliferation of T and NK cells. Activates JAK kinases and a variety of transcription activators such as STATs -3,-5 and -6.                                                                                         |
| Interleukin-17 (IL-17)                                                       | IL17A                       | A proinflammatory cytokine produced by activated T cells that regulates kinases of the NFkB and MAPK pathways. Can stimulate the induction/production of IL6, COX2 and nitric oxide.                                                          |
| Interleukin-23 (IL-23)                                                       | IL23A                       | Can activate the transcription of STAT4 and produce interferon gamma.                                                                                                                                                                         |
| Latency-Associated Peptide of Transforming Growth Factor beta 1 (LAP TGF-b1) | TGFB1                       | Secreted ligand of TGF-beta which can activate SMAD family transcription factors.                                                                                                                                                             |
| Macrophage Migration Inhibitory Factor (MIF)                                 | MIF                         | A lymphokine involved in cell-mediated immunity, immunoregulation and inflammation. Suppresses anti-inflammatory effects of glucocorticoids through the regulation of macrophage function.                                                    |
| Matrix Metalloproteinase-3 (MMP-3)                                           | MMP3                        | Involved in the breakdown of the extracellular matrix. MMP3 is involved in the degradation of fibronectin, laminin, collagens and proteoglycans.                                                                                              |

| <b>Biomarker name</b>                             | <b>Official gene symbol</b> | <b>Brief description (from NCBI gene)</b>                                                                                                                                                                          |
|---------------------------------------------------|-----------------------------|--------------------------------------------------------------------------------------------------------------------------------------------------------------------------------------------------------------------|
| Matrix Metalloproteinase-9 (MMP-9)                | MMP9                        | Involved in the breakdown of the extracellular matrix. MMP9 degrades type IV and V collagens.                                                                                                                      |
| MHC class I chain-related protein A (MICA)        | MICA                        | Expressed on the cell surface but seems to act non-canonically as it does not associate beta-2-microglobin. Functions as a stress-induced antigen broadly recognized by intestinal epithelial gamma delta T cells. |
| Myoglobin                                         | MB                          | Part of the globin superfamily. Predominantly express in skeletal and cardiac muscles. Plays a role in regulating nitric oxide levels.                                                                             |
| Osteoprotegerin (OPG)                             | TNFRSF11B                   | Member of the TNF receptor superfamily that functions as a negative regulator of bone resorption. A key regulator of osteoclast development.                                                                       |
| Plasminogen Activator Inhibitor 1 (PAI-1)         | SERPINE1                    | Member of the serine proteinase inhibitor superfamily which acts as an inhibitor of fibrinolysis.                                                                                                                  |
| Stem Cell Factor (SCF)                            | KITLG                       | A pleotropic factor that appears to act in cell migration and is a requirement in hematopoiesis.                                                                                                                   |
| T-Cell-Specific Protein RANTES (RANTES)           | CCL5                        | A chemokine involved in the immunoregulatory and inflammatory process. Functions as a chemoattractant for blood monocytes, memory T helper cells and eosinophils.                                                  |
| Tissue Inhibitor of Metalloproteinases 1 (TIMP-1) | TIMP1                       | Natural inhibitors of MMPs, but can also promote cell proliferation and may have anti-apoptotic functions.                                                                                                         |
| Tumor Necrosis Factor Receptor 1 (TNFRI)          | TNFRSF1A                    | A receptor found in both membrane and soluble forms that interacts with TNF-alpha. Plays a role in cell survival, apoptosis and inflammation.                                                                      |
| Tumor necrosis factor receptor 2 (TNFR2)          | TNFRSF1B                    | Forms a heterocomplex with TNF receptor 1 that mediates the recruitment of two anti-apoptotic proteins that possess E3 ligase activity.                                                                            |
| Vascular Cell Adhesion Molecule-1 (VCAM-1)        | VCAM1                       | A type I membrane protein that mediates leukocyte-endothelial cell adhesion and signal transduction.                                                                                                               |
| Vascular Endothelial Growth Factor (VEGF)         | VEGFA                       | Induces proliferation and migration of vascular endothelial cells and is essential for angiogenesis.                                                                                                               |
| Vitamin D-Binding Protein (VDBP)                  | GC                          | A multifunctional protein found in the plasma, ascitic fluid, cerebrospinal fluid and on the surfaces of many cells. It binds to vitamin D.                                                                        |
| Erythropoietin (EPO)                              | EPO                         | Binds to the erythropoietin receptor to promote red blood cell production in the bone marrow. Expression is upregulated under hypoxic conditions.                                                                  |
| High-density lipoprotein (HDL)                    | APOA1                       | Encodes the major component of HDL in the plasma which promotes cholesterol efflux from tissues to the liver for excretion.                                                                                        |
| Low-density lipoprotein (LDL)                     | APOE                        | Essential for the normal catabolism of triglyceride-rich lipoprotein constituents.                                                                                                                                 |

| <b>Biomarker name</b>                                                 | <b>Official gene symbol</b> | <b>Brief description (from NCBI gene)</b>                                                                                                                                                                                 |
|-----------------------------------------------------------------------|-----------------------------|---------------------------------------------------------------------------------------------------------------------------------------------------------------------------------------------------------------------------|
| C-reactive protein (CRP)                                              | CRP                         | Able to recognize foreign pathogens and damaged cells of the host and initiate initiation of host defense.                                                                                                                |
| Interferon- $\gamma$ (IFN- $\gamma$ )                                 | IFNG                        | A protein secreted by innate and adaptive immune cells that triggers a cellular response to viral and microbial infections.                                                                                               |
| Interleukin-6 (IL-6)                                                  | IL6                         | Functions in the inflammation and maturation of B cells. Primarily produced at sites of acute and chronic inflammation.                                                                                                   |
| Interleukin-8 (IL-8)                                                  | CXCL8                       | Secreted by mononuclear macrophages, neutrophils, eosinophils, T lymphocytes, epithelial cells and fibroblasts. Functions as a chemotactic factor for neutrophils. Bacterial and viral products induce expression of IL8. |
| Interferon $\gamma$ -Inducible Protein-10 (IP-10)                     | CXCL10                      | Encodes a chemokine. Binds to CXCR3 receptor that results in stimulation of monocytes, NK and T cell migration and modulation of adhesion molecule expression.                                                            |
| Interferon $\gamma$ -Inducible T cell $\alpha$ Chemoattractant (ITAC) | CXCL11                      | A chemokine. Induces a chemotactic response in activated T cells and is the dominant ligand for CXCR3 receptor.                                                                                                           |
| Leptin                                                                | LEP                         | Secreted by white adipocytes into circulation and plays a role in regulating energy homeostasis. Also involved in regulation of immune and inflammatory responses.                                                        |
| Osteocalcin (OCL)                                                     | BGLAP                       | Encodes a highly abundant bone protein secreted by osteoblasts which regulates bone remodeling. Serum osteocalcin levels may negatively correlate to metabolic syndrome.                                                  |
| Osteonectin (ONN)                                                     | SPARC                       | Encodes a matrix-associated protein that is required for the collagen in bone to become calcified.                                                                                                                        |
| Osteopontin (OPN)                                                     | SPP1                        | Involves in the attachment of osteoclasts to the mineralized bone matrix. Also acts as a cytokine that upregulates the expression of IFNG and IL12.                                                                       |
| Serum Amyloid A (SAA)                                                 | SAA1                        | A major acute phase protein that is highly expressed in response to inflammation and tissue injury. Plays an important role in HDL and cholesterol metabolism and homeostasis, respectively.                              |

**Table S2: Top 20 pathways in Cluster 1**

| <b>Term</b>                                                                        | <b>P-value</b> | <b>Adjusted P-value</b> | <b>Odds Ratio</b> | <b>Combined Score</b> | <b>Genes</b>                                          |
|------------------------------------------------------------------------------------|----------------|-------------------------|-------------------|-----------------------|-------------------------------------------------------|
| <i>Oncostatin M</i>                                                                | 2.18E-13       | 3.30E-10                | 38.585209         | 1124.859446           | CRP;ANGPT2;CCL5;ADIPOQ;IGFBP2;SERPINE1;HP;TIMP1;ICAM1 |
| <i>RAGE pathway</i>                                                                | 2.76E-12       | 2.09E-09                | 133.3333333       | 3548.682453           | ANGPT2;TGFB1;ADIPOQ;SERPINE1;TIMP1;ICAM1              |
| <i>Vitamin B12 metabolism</i>                                                      | 5.43E-08       | 2.73E-05                | 102.5641026       | 1715.805366           | CRP;CCL5;SERPINE1;ICAM1                               |
| <i>Response to elevated platelet cytosolic calcium</i>                             | 3.63E-07       | 1.37E-04                | 64.25702811       | 952.7785806           | TGFB1;SPARC;SERPINE1;TIMP1                            |
| <i>Interleukin-11 pathway</i>                                                      | 5.99E-07       | 1.81E-04                | 173.9130435       | 2491.836273           | TGFB1;TIMP1;ICAM1                                     |
| <i>TWEAK regulation of gene expression</i>                                         | 9.87E-07       | 2.49E-04                | 148.1481481       | 2048.607828           | CCL5;SERPINE1;ICAM1                                   |
| <i>Selenium pathway</i>                                                            | 1.14E-05       | 0.002455403             | 66.66666667       | 758.894624            | CRP;SERPINE1;ICAM1                                    |
| <i>Folate metabolism</i>                                                           | 1.32E-05       | 0.002489863             | 63.49206349       | 713.393721            | CRP;SERPINE1;ICAM1                                    |
| <i>Interleukin-6 regulation of target genes</i>                                    | 4.75E-05       | 0.005980516             | 190.4761905       | 1896.039371           | TIMP1;ICAM1                                           |
| <i>Urokinase-type plasminogen activator (uPA) and uPAR-mediated signaling</i>      | 4.44E-04       | 0.037269056             | 63.49206349       | 490.1006395           | TGFB1;SERPINE1                                        |
| <i>Influenza factor interactions with host</i>                                     | 0.004492068    | 0.242250831             | 222.2222222       | 1201.209337           | TGFB1                                                 |
| <i>Eosinophils in the chemokine network of allergy</i>                             | 0.005985243    | 0.282428646             | 166.6666667       | 853.0763944           | CCL5                                                  |
| <i>Visceral fat deposits and the metabolic syndrome</i>                            | 0.005985243    | 0.291539248             | 166.6666667       | 853.0763944           | ADIPOQ                                                |
| <i>Transcription factor regulation of microRNAs related to cardiac hypertrophy</i> | 0.005985243    | 0.301257223             | 166.6666667       | 853.0763944           | TGFB1                                                 |
| <i>Inhibition of matrix metalloproteinases</i>                                     | 0.006731046    | 0.30799637              | 148.1481481       | 740.8925408           | TIMP1                                                 |
| <i>Dissolution of fibrin clot</i>                                                  | 0.005985243    | 0.311645403             | 166.6666667       | 853.0763944           | SERPINE1                                              |
| <i>B lymphocyte cell surface molecules</i>                                         | 0.008221088    | 0.335509272             | 121.2121212       | 581.9457822           | ICAM1                                                 |
| <i>Monocyte and its surface molecules</i>                                          | 0.008221088    | 0.344828974             | 121.2121212       | 581.9457822           | ICAM1                                                 |

| <b>Term</b>                                              | <b>P-value</b> | <b>Adjusted P-value</b> | <b>Odds Ratio</b> | <b>Combined Score</b> | <b>Genes</b> |
|----------------------------------------------------------|----------------|-------------------------|-------------------|-----------------------|--------------|
| <i>CTL mediated immune response against target cells</i> | 0.009709044    | 0.349063256             | 102.5641026       | 475.353583            | ICAM1        |
| <i>TGF-beta signaling in gastrointestinal stem cells</i> | 0.008221088    | 0.35468123              | 121.2121212       | 581.9457822           | TGFB1        |

**Table S3: Top 20 pathways in Cluster 2**

| <b>Term</b>                                                              | <b>P-value</b> | <b>Adjusted P-value</b> | <b>Odds Ratio</b> | <b>Combined Score</b> | <b>Genes</b>                                                     |
|--------------------------------------------------------------------------|----------------|-------------------------|-------------------|-----------------------|------------------------------------------------------------------|
| <i>Cytokine-cytokine receptor interaction</i>                            | 5.61E-15       | 8.47E-12                | 41.92872117       | 1375.873735           | CXCL10;IL6;KITLG;EPO;IL23A;IL2RA;LEP;TNFRSF11B;TNFRSF1B;TNFRSF1A |
| <i>Interleukin-1 regulation of extracellular matrix</i>                  | 7.20E-10       | 5.43E-07                | 55.55555556       | 1169.565723           | C3;IL1RN;IL6;MMP3;TNFRSF11B;ICAM1                                |
| <i>Thymic stromal lymphopoietin (TSLP) pathway</i>                       | 1.35E-08       | 6.79E-06                | 61.72839506       | 1118.604074           | CXCL10;IL6;IL2RA;TNFRSF11B;ICAM1                                 |
| <i>Leptin influence on immune response</i>                               | 3.72E-08       | 1.40E-05                | 50.50505051       | 864.0427745           | CRP;IL1RN;IL6;IL2RA;TNFRSF11B                                    |
| <i>Erythrocyte differentiation pathway</i>                               | 2.77E-07       | 5.97E-05                | 222.2222222       | 3355.71187            | IL6;KITLG;EPO                                                    |
| <i>Cells and molecules involved in local acute inflammatory response</i> | 4.13E-07       | 7.79E-05                | 196.0784314       | 2882.35841            | C3;IL6;ICAM1                                                     |
| <i>Hematopoietic cell lineage</i>                                        | 1.02E-06       | 1.40E-04                | 50.50505051       | 696.6882003           | IL6;KITLG;EPO;IL2RA                                              |
| <i>TWEAK regulation of gene expression</i>                               | 1.77E-06       | 2.22E-04                | 123.4567901       | 1635.392515           | CXCL10;IL6;ICAM1                                                 |
| <i>Inflammatory response pathway</i>                                     | 2.45E-06       | 2.84E-04                | 111.1111111       | 1435.608352           | IL2RA;TNFRSF1B;TNFRSF1A                                          |
| <i>Vitamin B12 metabolism</i>                                            | 1.32E-05       | 0.001241833             | 64.1025641        | 720.4129978           | CRP;IL6;ICAM1                                                    |
| <i>SODD/TNFR1 signaling pathway</i>                                      | 5.02E-05       | 0.003297152             | 185.1851852       | 1833.160517           | TNFRSF1B;TNFRSF1A                                                |
| <i>CTL mediated immune response against target cells</i>                 | 5.93E-05       | 0.003732289             | 170.9401709       | 1663.682827           | B2M;ICAM1                                                        |
| <i>Interleukin-17 signaling pathway</i>                                  | 7.98E-05       | 0.004632824             | 148.1481481       | 1397.978819           | IL6;KITLG                                                        |
| <i>Hematopoiesis regulation by cytokines</i>                             | 7.98E-05       | 0.004818137             | 148.1481481       | 1397.978819           | IL6;EPO                                                          |
| <i>Acetylation and deacetylation of RelA in the nucleus</i>              | 9.11E-05       | 0.005095845             | 138.8888889       | 1292.133026           | TNFRSF1B;TNFRSF1A                                                |

| <b>Term</b>                                                       | <b>P-value</b> | <b>Adjusted P-value</b> | <b>Odds Ratio</b> | <b>Combined Score</b> | <b>Genes</b>      |
|-------------------------------------------------------------------|----------------|-------------------------|-------------------|-----------------------|-------------------|
| <i>Transcriptional activity regulation by PML</i>                 | 1.16E-04       | 0.005841261             | 123.4567901       | 1118.700756           | TNFRSF1B;TNFRSF1A |
| <i>Modulation of interferon signaling by chaperones</i>           | 1.91E-04       | 0.008757636             | 96.61835749       | 827.1677915           | TNFRSF1B;TNFRSF1A |
| <i>NF-kappaB signaling pathway</i>                                | 2.09E-04       | 0.009267855             | 92.59259259       | 784.6951641           | TNFRSF1B;TNFRSF1A |
| <i>Low-density lipoprotein (LDL) pathway during atherogenesis</i> | 0.005388466    | 0.12915212              | 185.1851852       | 967.313805            | IL6               |
| <i>Activation of C3 and C5</i>                                    | 0.005388466    | 0.131235219             | 185.1851852       | 967.313805            | C3                |

**Table S4: Top 20 pathways in Cluster 3**

| Term                                                                               | P-value     | Adjusted P-value | Odds Ratio  | Combined Score | Genes                                       |
|------------------------------------------------------------------------------------|-------------|------------------|-------------|----------------|---------------------------------------------|
| <i>Oncostatin M</i>                                                                | 4.95E-13    | 3.74E-10         | 46.76995031 | 1325.181907    | CRP;CCL5;SERPINE1;HP;CCL2;TIMP1;ICAM1;VEGFA |
| <i>RAGE pathway</i>                                                                | 2.57E-13    | 3.89E-10         | 181.8181818 | 5270.643369    | TGFB1;SERPINE1;CCL2;TIMP1;ICAM1;VEGFA       |
| <i>Vitamin B12 metabolism</i>                                                      | 4.45E-11    | 2.24E-08         | 174.8251748 | 4167.009539    | CRP;CCL5;SERPINE1;CCL2;ICAM1                |
| <i>Response to elevated platelet cytosolic calcium</i>                             | 4.93E-10    | 1.86E-07         | 109.5290252 | 2347.167916    | TGFB1;SPARC;SERPINE1;TIMP1;VEGFA            |
| <i>TWEAK regulation of gene expression</i>                                         | 8.63E-10    | 2.61E-07         | 269.3602694 | 5621.642225    | CCL5;SERPINE1;CCL2;ICAM1                    |
| <i>Leptin influence on immune response</i>                                         | 2.07E-09    | 5.20E-07         | 82.6446281  | 1652.697978    | CRP;CCL5;CCL2;TIMP1;VEGFA                   |
| <i>Selenium pathway</i>                                                            | 2.38E-08    | 5.13E-06         | 121.2121212 | 2127.882057    | CRP;SERPINE1;CCL2;ICAM1                     |
| <i>Folate metabolism</i>                                                           | 2.90E-08    | 5.47E-06         | 115.4401154 | 2003.550262    | CRP;SERPINE1;CCL2;ICAM1                     |
| <i>Interleukin-11 pathway</i>                                                      | 2.18E-07    | 3.29E-05         | 237.1541502 | 3637.807935    | TGFB1;TIMP1;ICAM1                           |
| <i>Malaria</i>                                                                     | 2.54E-06    | 3.20E-04         | 106.9518717 | 1377.881166    | TGFB1;CCL2;ICAM1                            |
| <i>Interleukin-6 regulation of target genes</i>                                    | 2.49E-05    | 0.001882589      | 259.7402597 | 2753.049316    | TIMP1;ICAM1                                 |
| <i>Fibroblast growth factor 1</i>                                                  | 8.87E-05    | 0.005825605      | 139.8601399 | 1304.875962    | SERPINE1;VEGFA                              |
| <i>Neophilin interactions with VEGF and VEGF receptor</i>                          | 0.002747205 | 0.094279093      | 363.6363636 | 2144.425861    | VEGFA                                       |
| <i>Kit receptor transcriptional targets</i>                                        | 0.002747205 | 0.09647163       | 363.6363636 | 2144.425861    | VEGFA                                       |
| <i>MSP/RON receptor signaling pathway</i>                                          | 0.003295826 | 0.103681183      | 303.030303  | 1731.848048    | CCL2                                        |
| <i>Low-density lipoprotein (LDL) pathway during atherogenesis</i>                  | 0.003295826 | 0.105887165      | 303.030303  | 1731.848048    | CCL2                                        |
| <i>Influenza factor interactions with host</i>                                     | 0.003295826 | 0.10818906       | 303.030303  | 1731.848048    | TGFB1                                       |
| <i>Eosinophils in the chemokine network of allergy</i>                             | 0.004392244 | 0.130044883      | 227.2727273 | 1233.61703     | CCL5                                        |
| <i>Transcription factor regulation of microRNAs related to cardiac hypertrophy</i> | 0.004392244 | 0.132645781      | 227.2727273 | 1233.61703     | TGFB1                                       |
| <i>Dissolution of fibrin clot</i>                                                  | 0.004392244 | 0.135352838      | 227.2727273 | 1233.61703     | SERPINE1                                    |

**Table S5: Top 20 pathways in Cluster 4**

| Term                                                                        | P-value     | Adjusted P-value | Odds Ratio  | Combined Score | Genes                                                    |
|-----------------------------------------------------------------------------|-------------|------------------|-------------|----------------|----------------------------------------------------------|
| <i>Oncostatin M</i>                                                         | 6.76E-14    | 1.02E-10         | 27.20751917 | 825.0626424    | CRP;FGB;IL6;ANGPT2;ADIPOQ;IGFBP2;MMP3;HP;TIMP1;B2M;ICAM1 |
| <i>RAGE pathway</i>                                                         | 9.58E-13    | 7.23E-10         | 89.74358974 | 2483.577873    | IL6;ANGPT2;VCAM1;ADIPOQ;TNFRSF11B;TIMP1;ICAM1            |
| <i>TNF-alpha effects on cytokine activity, cell motility, and apoptosis</i> | 3.23E-10    | 1.62E-07         | 39.88603989 | 871.7021773    | CXCL10;IL6;CXCL11;VCAM1;IL2RA;IGFBP2;ICAM1               |
| <i>Cells and molecules involved in local acute inflammatory response</i>    | 5.28E-09    | 1.59E-06         | 180.9954751 | 3449.754807    | C3;IL6;VCAM1;ICAM1                                       |
| <i>TWEAK regulation of gene expression</i>                                  | 3.86E-08    | 9.71E-06         | 113.960114  | 1945.38053     | CXCL10;IL6;VCAM1;ICAM1                                   |
| <i>Integrin beta-2 pathway</i>                                              | 5.21E-08    | 1.12E-05         | 106.1007958 | 1779.299731    | C3;FGB;VCAM1;ICAM1                                       |
| <i>Thymic stromal lymphopoietin (TSLP) pathway</i>                          | 1.01E-07    | 1.90E-05         | 42.73504274 | 688.5228567    | CXCL10;IL6;IL2RA;TNFRSF11B;ICAM1                         |
| <i>Leptin influence on immune response</i>                                  | 2.75E-07    | 4.62E-05         | 34.96503497 | 528.1388796    | CRP;IL6;IL2RA;TNFRSF11B;TIMP1                            |
| <i>Interleukin-6 regulation of target genes</i>                             | 7.03E-07    | 9.65E-05         | 164.8351648 | 2335.338597    | SERPINA1;TIMP1;ICAM1                                     |
| <i>Inflammatory response pathway</i>                                        | 7.74E-06    | 9.73E-04         | 76.92307692 | 905.362349     | IL2RA;TNFRSF1B;TNFRSF1A                                  |
| <i>SODD/TNFR1 signaling pathway</i>                                         | 1.06E-04    | 0.006426335      | 128.2051282 | 1172.864094    | TNFRSF1B;TNFRSF1A                                        |
| <i>CTL mediated immune response against target cells</i>                    | 1.26E-04    | 0.007026572      | 118.3431953 | 1062.96856     | B2M;ICAM1                                                |
| <i>Adhesion and diapedesis of lymphocytes</i>                               | 1.46E-04    | 0.007898584      | 109.8901099 | 970.1903532    | VCAM1;ICAM1                                              |
| <i>Erythrocyte differentiation pathway</i>                                  | 1.69E-04    | 0.007968166      | 102.5641026 | 890.9158971    | IL6;KITLG                                                |
| <i>Interleukin-17 signaling pathway</i>                                     | 1.69E-04    | 0.008225203      | 102.5641026 | 890.9158971    | IL6;KITLG                                                |
| <i>Acetylation and deacetylation of RelA in the nucleus</i>                 | 1.93E-04    | 0.008563958      | 96.15384615 | 822.4708919    | TNFRSF1B;TNFRSF1A                                        |
| <i>Transcriptional activity regulation by PML</i>                           | 2.45E-04    | 0.010017702      | 85.47008547 | 710.4571392    | TNFRSF1B;TNFRSF1A                                        |
| <i>Modulation of interferon signaling by chaperones</i>                     | 4.04E-04    | 0.014196982      | 66.88963211 | 522.6348271    | TNFRSF1B;TNFRSF1A                                        |
| <i>Low-density lipoprotein (LDL) pathway during atherogenesis</i>           | 0.007775574 | 0.152482038      | 128.2051282 | 622.6625614    | IL6                                                      |
| <i>Activation of C3 and C5</i>                                              | 0.007775574 | 0.154488381      | 128.2051282 | 622.6625614    | C3                                                       |

**Table S6: Top 20 GO terms-Biological Processes in Cluster 1**

| Term ID    | term description                                        | false discovery rate | matching proteins in your network                                                      |
|------------|---------------------------------------------------------|----------------------|----------------------------------------------------------------------------------------|
| GO:0009605 | response to external stimulus                           | 8.19E-09             | ADIPOQ,ANGPT2,BDNF,CCL24,CCL5,CRP,HP,ICAM1,IGFBP2,SAA1,SERPINE1,SPARC,TGFB1            |
| GO:0070887 | cellular response to chemical stimulus                  | 4.19E-07             | ADIPOQ,ANGPT2,BDNF,CCL24,CCL5,HP,ICAM1,IGFBP2,SAA1,SERPINE1,SPARC,TGFB1,TIMP1          |
| GO:0006954 | inflammatory response                                   | 4.68E-07             | CCL24,CCL5,CRP,HP,ICAM1,SAA1,TGFB1,TIMP1                                               |
| GO:0030334 | regulation of cell migration                            | 4.68E-07             | ADIPOQ,ANGPT2,CCL24,CCL5,ICAM1,SERPINE1,SPARC,TGFB1,TIMP1                              |
| GO:0071310 | cellular response to organic substance                  | 5.14E-07             | ADIPOQ,ANGPT2,BDNF,CCL24,CCL5,ICAM1,IGFBP2,SAA1,SERPINE1,SPARC,TGFB1,TIMP1             |
| GO:0009617 | response to bacterium                                   | 6.06E-07             | ADIPOQ,CCL5,CRP,HP,ICAM1,SERPINE1,SPARC,TGFB1                                          |
| GO:0010469 | regulation of signaling receptor activity               | 6.89E-07             | ADIPOQ,BDNF,CCL24,CCL5,SAA1,SERPINE1,TGFB1,TIMP1                                       |
| GO:0048518 | positive regulation of biological process               | 7.91E-07             | ADIPOQ,ANGPT2,BDNF,CCL24,CCL5,CRP,HP,ICAM1,IGFBP2,IST1,SAA1,SERPINE1,SPARC,TGFB1,TIMP1 |
| GO:0030155 | regulation of cell adhesion                             | 8.66E-07             | ADIPOQ,ANGPT2,CCL5,ICAM1,IGFBP2,SAA1,SERPINE1,TGFB1                                    |
| GO:0022603 | regulation of anatomical structure morphogenesis        | 9.02E-07             | ADIPOQ,ANGPT2,BDNF,CCL24,ICAM1,IST1,SERPINE1,SPARC,TGFB1                               |
| GO:0032879 | regulation of localization                              | 9.02E-07             | ADIPOQ,ANGPT2,BDNF,CCL24,CCL5,CRP,ICAM1,SAA1,SERPINE1,SPARC,TGFB1,TIMP1                |
| GO:1901700 | response to oxygen-containing compound                  | 1.11E-06             | ADIPOQ,ANGPT2,CCL5,HP,ICAM1,IGFBP2,SERPINE1,SPARC,TGFB1,TIMP1                          |
| GO:0051239 | regulation of multicellular organismal process          | 2.31E-06             | ADIPOQ,ANGPT2,BDNF,CCL24,CRP,ICAM1,IST1,SAA1,SERPINE1,SPARC,TGFB1,TIMP1                |
| GO:0051240 | positive regulation of multicellular organismal process | 2.31E-06             | ADIPOQ,ANGPT2,BDNF,CCL24,ICAM1,IST1,SAA1,SERPINE1,SPARC,TGFB1                          |
| GO:0002687 | positive regulation of leukocyte migration              | 3.41E-06             | CCL24,CCL5,ICAM1,SERPINE1,TGFB1                                                        |
| GO:0051704 | multi-organism process                                  | 3.41E-06             | ADIPOQ,ANGPT2,CCL5,CRP,HP,ICAM1,IGFBP2,IST1,SERPINE1,SPARC,TGFB1                       |
| GO:0048522 | positive regulation of cellular process                 | 3.74E-06             | ADIPOQ,BDNF,CCL24,CCL5,CRP,HP,ICAM1,IGFBP2,IST1,SAA1,SERPINE1,SPARC,TGFB1,TIMP1        |
| GO:0006952 | defense response                                        | 4.42E-06             | CCL24,CCL5,CRP,HP,ICAM1,SAA1,SERPINE1,TGFB1,TIMP1                                      |
| GO:0034284 | response to monosaccharide                              | 4.42E-06             | ADIPOQ,ANGPT2,ICAM1,SPARC,TGFB1                                                        |
| GO:0050900 | leukocyte migration                                     | 4.42E-06             | ANGPT2,CCL24,CCL5,ICAM1,SAA1,TGFB1                                                     |

**Table S7: Top 20 GO terms-Biological Processes in Cluster 2**

| Term ID    | term description                               | false discovery rate | matching proteins in your network                                                               |
|------------|------------------------------------------------|----------------------|-------------------------------------------------------------------------------------------------|
| GO:0006954 | inflammatory response                          | 1.62E-16             | C3,CRP,CXCL10,EPO,HP,ICAM1,IL1RN,IL23A,IL2RA,IL6,SAA1,TNFRSF11B,TNFRSF1A,TNFRSF1B               |
| GO:0019221 | cytokine-mediated signaling pathway            | 5.40E-15             | B2M,CXCL10,EPO,ICAM1,IL1RN,IL23A,IL2RA,IL6,LEP,MMP3,SAA1,TNFRSF11B,TNFRSF1A,TNFRSF1B            |
| GO:0006952 | defense response                               | 3.82E-13             | B2M,C3,CRP,CXCL10,EPO,HP,ICAM1,IL1RN,IL23A,IL2RA,IL6,SAA1,TNFRSF11B,TNFRSF1A,TNFRSF1B           |
| GO:0002376 | immune system process                          | 1.14E-12             | B2M,C3,CRP,CXCL10,EPO,HP,ICAM1,IL1RN,IL23A,IL2RA,IL6,KITLG,LEP,SAA1,TNFRSF11B,TNFRSF1A,TNFRSF1B |
| GO:0009617 | response to bacterium                          | 1.14E-12             | B2M,C3,CRP,CXCL10,EPO,HP,ICAM1,IL23A,IL6,TNFRSF11B,TNFRSF1A,TNFRSF1B                            |
| GO:0002526 | acute inflammatory response                    | 8.65E-11             | CRP,EPO,HP,ICAM1,IL1RN,IL6,SAA1                                                                 |
| GO:0006950 | response to stress                             | 1.30E-10             | B2M,C3,CRP,CXCL10,EPO,HP,ICAM1,IL1RN,IL23A,IL2RA,IL6,LEP,MMP3,SAA1,TNFRSF11B,TNFRSF1A,TNFRSF1B  |
| GO:0006953 | acute-phase response                           | 4.98E-10             | CRP,EPO,HP,IL1RN,IL6,SAA1                                                                       |
| GO:0009605 | response to external stimulus                  | 1.18E-09             | B2M,C3,CRP,CXCL10,EPO,HP,ICAM1,IL23A,IL6,LEP,SAA1,TNFRSF11B,TNFRSF1A,TNFRSF1B                   |
| GO:0006955 | immune response                                | 3.34E-09             | B2M,C3,CXCL10,HP,ICAM1,IL1RN,IL23A,IL2RA,IL6,SAA1,TNFRSF11B,TNFRSF1A,TNFRSF1B                   |
| GO:0070887 | cellular response to chemical stimulus         | 5.84E-09             | B2M,CXCL10,EPO,HP,ICAM1,IL1RN,IL23A,IL2RA,IL6,LEP,MMP3,SAA1,TNFRSF11B,TNFRSF1A,TNFRSF1B         |
| GO:0051239 | regulation of multicellular organismal process | 9.61E-09             | B2M,C3,CRP,CXCL10,EPO,ICAM1,IL1RN,IL23A,IL2RA,IL6,LEP,SAA1,TNFRSF11B,TNFRSF1A,TNFRSF1B          |
| GO:0032496 | response to lipopolysaccharide                 | 9.68E-09             | B2M,CXCL10,EPO,ICAM1,IL6,TNFRSF11B,TNFRSF1A,TNFRSF1B                                            |
| GO:0050727 | regulation of inflammatory response            | 2.32E-08             | C3,IL23A,IL2RA,IL6,LEP,SAA1,TNFRSF1A,TNFRSF1B                                                   |
| GO:0050793 | regulation of developmental process            | 2.51E-08             | B2M,C3,CRP,CXCL10,EPO,ICAM1,IL1RN,IL23A,IL2RA,IL6,LEP,TNFRSF11B,TNFRSF1A,TNFRSF1B               |
| GO:0033993 | response to lipid                              | 3.88E-08             | B2M,CXCL10,EPO,ICAM1,IL1RN,IL6,LEP,TNFRSF11B,TNFRSF1A,TNFRSF1B                                  |
| GO:0048583 | regulation of response to stimulus             | 3.88E-08             | B2M,C3,CXCL10,EPO,ICAM1,IL1RN,IL23A,IL2RA,IL6,KITLG,LEP,MMP3,SAA1,TNFRSF11B,TNFRSF1A,TNFRSF1B   |
| GO:0010469 | regulation of signaling receptor activity      | 4.13E-08             | CXCL10,EPO,IL1RN,IL23A,IL6,KITLG,LEP,SAA1,TNFRSF11B                                             |

| <b>Term ID</b> | <b>term description</b>                   | <b>false discovery rate</b> | <b>matching proteins in your network</b>                                                       |
|----------------|-------------------------------------------|-----------------------------|------------------------------------------------------------------------------------------------|
| GO:0048519     | negative regulation of biological process | 5.80E-08                    | B2M,C3,CRP,CXCL10,EPO,HP,ICAM1,IL1RN,IL23A,IL2RA,IL6,LEP,MMP3,SAA1,TNFRSF11B,TNFRSF1A,TNFRSF1B |
| GO:0065009     | regulation of molecular function          | 7.77E-08                    | B2M,C3,CXCL10,EPO,HP,ICAM1,IL1RN,IL23A,IL2RA,IL6,KITLG,LEP,SAA1,TNFRSF11B,TNFRSF1B             |

**Table S8: Top 20 GO terms-Biological Processes in Cluster 3**

| <b>Term ID</b> | <b>term description</b>                                  | <b>false discovery rate</b> | <b>matching proteins in your network</b>                     |
|----------------|----------------------------------------------------------|-----------------------------|--------------------------------------------------------------|
| GO:0009617     | response to bacterium                                    | 1.20E-07                    | CCL2,CCL5,CRP,HP,ICAM1,SERPINE1,SPARC,TGFB1                  |
| GO:0002685     | regulation of leukocyte migration                        | 2.25E-07                    | CCL2,CCL5,ICAM1,SERPINE1,TGFB1,VEGFA                         |
| GO:0009605     | response to external stimulus                            | 3.58E-07                    | BDNF,CCL2,CCL5,CRP,HP,ICAM1,SERPINE1,SPARC,TGFB1,VEGFA       |
| GO:0030334     | regulation of cell migration                             | 3.58E-07                    | CCL2,CCL5,ICAM1,SERPINE1,SPARC,TGFB1,TIMP1,VEGFA             |
| GO:0006954     | inflammatory response                                    | 4.93E-07                    | CCL2,CCL5,CRP,HP,ICAM1,TGFB1,TIMP1                           |
| GO:0002576     | platelet degranulation                                   | 8.46E-07                    | SERPINE1,SPARC,TGFB1,TIMP1,VEGFA                             |
| GO:0002687     | positive regulation of leukocyte migration               | 8.46E-07                    | CCL5,ICAM1,SERPINE1,TGFB1,VEGFA                              |
| GO:0010469     | regulation of signaling receptor activity                | 8.46E-07                    | BDNF,CCL2,CCL5,SERPINE1,TGFB1,TIMP1,VEGFA                    |
| GO:0032496     | response to lipopolysaccharide                           | 8.46E-07                    | CCL2,CCL5,ICAM1,SERPINE1,SPARC,TGFB1                         |
| GO:0010941     | regulation of cell death                                 | 1.01E-06                    | BDNF,CCL2,CCL5,HP,ICAM1,SERPINE1,TGFB1,TIMP1,VEGFA           |
| GO:0071222     | cellular response to lipopolysaccharide                  | 1.11E-06                    | CCL2,CCL5,ICAM1,SERPINE1,TGFB1                               |
| GO:0032879     | regulation of localization                               | 1.17E-06                    | BDNF,CCL2,CCL5,CRP,ICAM1,SERPINE1,SPARC,TGFB1,TIMP1,VEGFA    |
| GO:0070887     | cellular response to chemical stimulus                   | 1.85E-06                    | BDNF,CCL2,CCL5,HP,ICAM1,SERPINE1,SPARC,TGFB1,TIMP1,VEGFA     |
| GO:0050731     | positive regulation of peptidyl-tyrosine phosphorylation | 2.41E-06                    | BDNF,CCL5,ICAM1,TGFB1,VEGFA                                  |
| GO:0006952     | defense response                                         | 2.61E-06                    | CCL2,CCL5,CRP,HP,ICAM1,SERPINE1,TGFB1,TIMP1                  |
| GO:0050920     | regulation of chemotaxis                                 | 2.74E-06                    | CCL2,CCL5,SERPINE1,TGFB1,VEGFA                               |
| GO:0006887     | exocytosis                                               | 3.04E-06                    | CCL5,HP,SERPINE1,SPARC,TGFB1,TIMP1,VEGFA                     |
| GO:0070374     | positive regulation of ERK1 and ERK2 cascade             | 3.10E-06                    | CCL2,CCL5,ICAM1,TGFB1,VEGFA                                  |
| GO:0030335     | positive regulation of cell migration                    | 4.17E-06                    | CCL5,ICAM1,SERPINE1,SPARC,TGFB1,VEGFA                        |
| GO:0048523     | negative regulation of cellular process                  | 5.04E-06                    | BDNF,CCL2,CCL5,CRP,HP,ICAM1,SERPINE1,SPARC,TGFB1,TIMP1,VEGFA |

**Table S9: Top 20 GO terms-Biological Processes in Cluster 4**

| Term ID    | term description                       | false discovery rate | matching proteins in your network                                                                                                         |
|------------|----------------------------------------|----------------------|-------------------------------------------------------------------------------------------------------------------------------------------|
| GO:0006952 | defense response                       | 9.12E-15             | B2M,C3,CRP,CXCL10,CXCL11,FGB,HP,ICAM1,IFNA1,IL12RB1,IL2RA,IL6,SAA1,SERPINA1,TIMP1,TNFRSF11B,TNFRSF1A,TNFRSF1B,VCAM1                       |
| GO:0006954 | inflammatory response                  | 9.12E-15             | C3,CRP,CXCL10,CXCL11,HP,ICAM1,IL2RA,IL6,SAA1,SERPINA1,TIMP1,TNFRSF11B,TNFRSF1A,TNFRSF1B,VCAM1                                             |
| GO:0019221 | cytokine-mediated signaling pathway    | 2.41E-13             | B2M,CXCL10,CXCL11,ICAM1,IFNA1,IL12RB1,IL2RA,IL6,MMP3,SAA1,TIMP1,TNFRSF11B,TNFRSF1A,TNFRSF1B,VCAM1                                         |
| GO:0034097 | response to cytokine                   | 2.41E-13             | ADIPOQ,B2M,CXCL10,CXCL11,FGB,ICAM1,IFNA1,IL12RB1,IL2RA,IL6,MMP3,SAA1,TIMP1,TNFRSF11B,TNFRSF1A,TNFRSF1B,VCAM1                              |
| GO:0002376 | immune system process                  | 5.89E-13             | ANGPT2,B2M,C3,CRP,CXCL10,CXCL11,FGB,HP,ICAM1,IFNA1,IL12RB1,IL2RA,IL6,IST1,KITLG,SAA1,SERPINA1,TNFRSF11B,TNFRSF1A,TNFRSF1B,VCAM1           |
| GO:0009617 | response to bacterium                  | 5.89E-13             | ADIPOQ,B2M,C3,CRP,CXCL10,CXCL11,FGB,HP,ICAM1,IL6,TNFRSF11B,TNFRSF1A,TNFRSF1B,VCAM1                                                        |
| GO:0071345 | cellular response to cytokine stimulus | 8.77E-13             | B2M,CXCL10,CXCL11,FGB,ICAM1,IFNA1,IL12RB1,IL2RA,IL6,MMP3,SAA1,TIMP1,TNFRSF11B,TNFRSF1A,TNFRSF1B,VCAM1                                     |
| GO:0009605 | response to external stimulus          | 2.78E-12             | ADIPOQ,ANGPT2,B2M,C3,CRP,CXCL10,CXCL11,FGB,HP,ICAM1,IFNA1,IGFBP2,IL6,OPHN1,SAA1,TNFRSF11B,TNFRSF1A,TNFRSF1B,VCAM1                         |
| GO:0006955 | immune response                        | 2.79E-12             | B2M,C3,CXCL10,CXCL11,FGB,HP,ICAM1,IFNA1,IL12RB1,IL2RA,IL6,IST1,SAA1,SERPINA1,TNFRSF11B,TNFRSF1A,TNFRSF1B,VCAM1                            |
| GO:0051707 | response to other organism             | 2.79E-12             | ADIPOQ,B2M,C3,CRP,CXCL10,CXCL11,FGB,HP,ICAM1,IFNA1,IL6,TNFRSF11B,TNFRSF1A,TNFRSF1B,VCAM1                                                  |
| GO:0006950 | response to stress                     | 7.81E-12             | ADIPOQ,ANGPT2,B2M,C3,CRP,CXCL10,CXCL11,FGB,HP,ICAM1,IFNA1,IL12RB1,IL2RA,IL6,MMP3,SAA1,SERPINA1,TIMP1,TNFRSF11B,TNFRSF1A,TNFRSF1B,VCAM1    |
| GO:0071310 | cellular response to organic substance | 4.02E-11             | ADIPOQ,ANGPT2,B2M,CXCL10,CXCL11,FGB,ICAM1,IFNA1,IGFBP2,IL12RB1,IL2RA,IL6,MMP3,SAA1,TIMP1,TNFRSF11B,TNFRSF1A,TNFRSF1B,VCAM1                |
| GO:0070887 | cellular response to chemical stimulus | 5.84E-11             | ADIPOQ,ANGPT2,B2M,CXCL10,CXCL11,FGB,HP,ICAM1,IFNA1,IGFBP2,IL12RB1,IL2RA,IL6,MMP3,SAA1,TIMP1,TNFRSF11B,TNFRSF1A,TNFRSF1B,VCAM1             |
| GO:0048583 | regulation of response to stimulus     | 2.41E-10             | ADIPOQ,ANGPT2,B2M,C3,CXCL10,CXCL11,FGB,ICAM1,IFNA1,IGFBP2,IL12RB1,IL2RA,IL6,KITLG,MMP3,OPHN1,SAA1,TIMP1,TNFRSF11B,TNFRSF1A,TNFRSF1B,VCAM1 |
| GO:0001775 | cell activation                        | 6.29E-10             | B2M,C3,CXCL10,FGB,HP,ICAM1,IFNA1,IL6,IST1,SAA1,SERPINA1,TIMP1,TNFRSF1B,VCAM1                                                              |

| <b>Term ID</b> | <b>term description</b>                     | <b>false discovery rate</b> | <b>matching proteins in your network</b>                                                                                                                       |
|----------------|---------------------------------------------|-----------------------------|----------------------------------------------------------------------------------------------------------------------------------------------------------------|
| GO:0051704     | multi-organism process                      | 6.29E-10                    | ADIPOQ,ANGPT2,B2M,C3,CRP,CXCL10,CXCL11,FGB,HP,ICAM1,IFNA1,IGFBP2,IL6,IST1,TNFRSF11B,TNFRSF1A,TNFRSF1B,VCAM1                                                    |
| GO:0002526     | acute inflammatory response                 | 7.63E-10                    | CRP,HP,ICAM1,IL6,SAA1,SERPINA1,VCAM1                                                                                                                           |
| GO:1901700     | response to oxygen-containing compound      | 2.58E-09                    | ADIPOQ,ANGPT2,B2M,CXCL10,CXCL11,HP,ICAM1,IGFBP2,IL6,MMP3,TIMP1,TNFRSF11B,TNFRSF1A,TNFRSF1B,VCAM1                                                               |
| GO:0050896     | response to stimulus                        | 3.38E-09                    | ADIPOQ,ANGPT2,B2M,C3,CRP,CXCL10,CXCL11,FGB,HP,ICAM1,IFNA1,IGFBP2,IL12RB1,IL2RA,IL6,IST1,KITLG,MMP3,OPHN1,SAA1,SERPINA1,TIMP1,TNFRSF11B,TNFRSF1A,TNFRSF1B,VCAM1 |
| GO:0032101     | regulation of response to external stimulus | 3.44E-09                    | ADIPOQ,ANGPT2,C3,CXCL10,CXCL11,FGB,IL12RB1,IL2RA,IL6,SAA1,TNFRSF1A,TNFRSF1B                                                                                    |
